# Supplementary material
Source: Springer Nature journal article supplement (https://www.springermedizin.de/resource/supplementary/12876_2008_270_MOESM3_ESM.pdf/9439056)

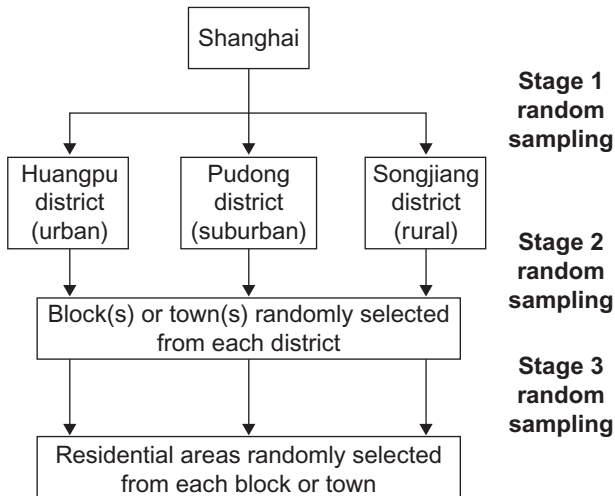

Supplement: MOESM3 [file 9439056]
